# Supplementary material
Source: MDPI journal article supplement (https://www.mdpi.com/2071-1050/9/9/1666)
Supplement: s1 [file s1]

**Supplementary Figure 1. Study sites**. Fieldwork was carried out in 21 villages from the administrative regions of Bafatá (n= 9) and Gabu (n=12), eastern region of Guinea-Bissau. An ID number identifies each village, and geographic locations are also indicated.


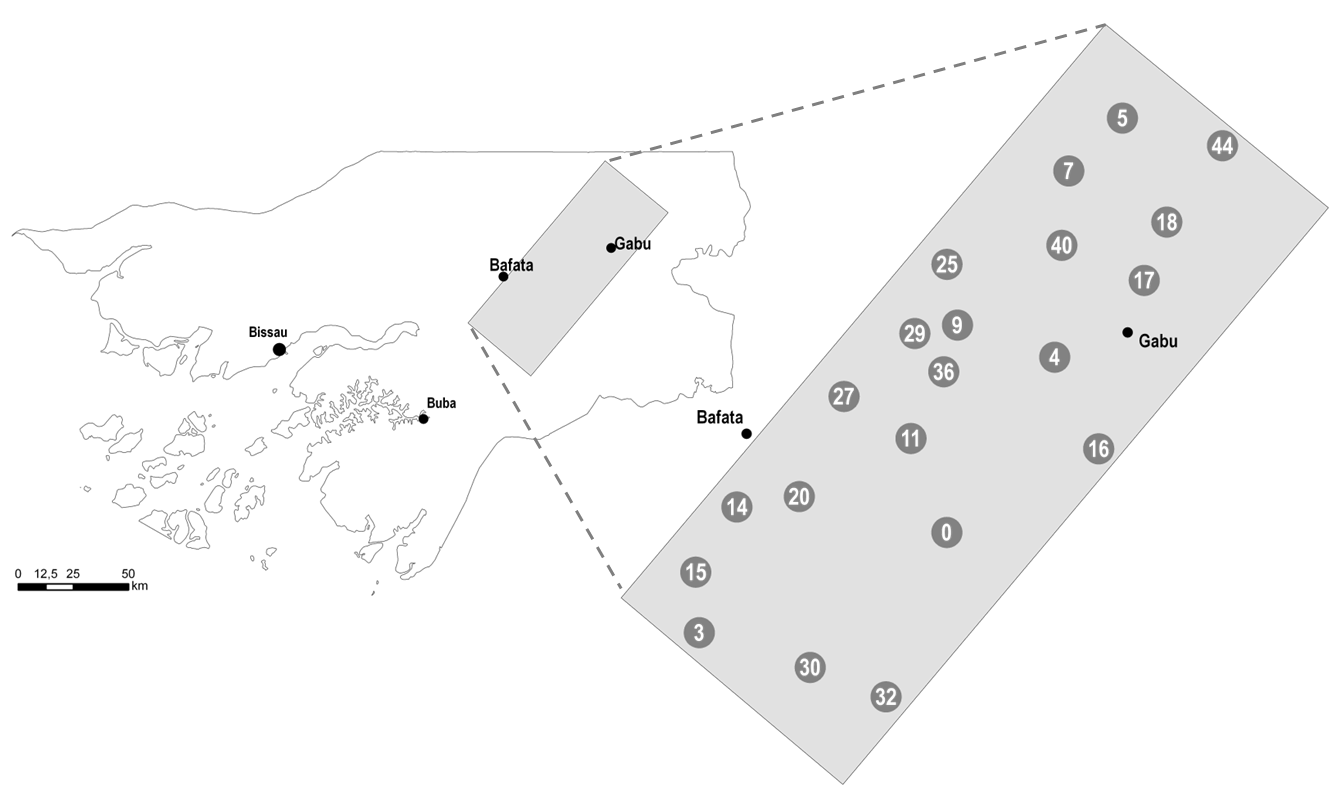


| Administrative Region | Village | ID | Habitants Number | Longitude | Latitude |
| --- | --- | --- | --- | --- | --- |
| Gabu | Cansamanje | 4 | 241 | -14.303 | 12.255 |
| Samba Candu | 5 | 268 | -14.222 | 12.532 |
| Taibata | 7 | 252 | -14.286 | 12.471 |
| Dembael Uri | 9 | 174 | -14.418 | 12.292 |
| Mamadu Molo | 17 | 164 | -14.197 | 12.344 |
| Biricunda | 18 | 256 | -14.170 | 12.411 |
| Sintcha Debel | 25 | 442 | -14.430 | 12.363 |
| Nhatampa | 29 | 376 | -14.468 | 12.283 |
| Fassadji | 36 | 239 | -14.434 | 12.238 |
| Duma | 40 | 102 | -14.294 | 12.385 |
| Sintcham Dembel | 44 | 423 | -14.104 | 12.500 |
| Bafatá | Catacunda | 0 | 147 | -14.431 | 12.052 |
| Bambadinca | 11 | 236 | -14.473 | 12.161 |
| Brincasse | 27 | 362 | -14.552 | 12.210 |
| Gã-Fati | 14 | 351 | -14.678 | 12.082 |
| Bagadadje | 15 | 185 | -14.727 | 12.006 |
| Tabandinto | 20 | 477 | -14.605 | 12.094 |
| Afia | 3 | 90 | -14.723 | 11.936 |
| Campate | 30 | 351 | -14.592 | 11.895 |
| Dulombi | 32 | 426 | -14.503 | 11.861 |

**Supplementary Table 1. Studied Villages, Plant species compositions within each village of the 21 villages screened in the administrative Regions of Gabu and Bafatá.** For each village identified by its name and an ID Number, 3 sampling plots (_1, _2, _3) were performed to assess plant species diversity. Trees per plot and Density were determined by the number of individuals per taxon and % plant density within in each plot were also assessed.

| **Administrative region** | **Village Name/ID** | **Longitude** | **Latitude** | **Population Number** | **Plots** | **Species** | **Family** | **Trees per plot** | **Density (trees/ha)** | **% plant density** |
| --- | --- | --- | --- | --- | --- | --- | --- | --- | --- | --- |
| Bafatá | Tabandinto/20 | -14.605 | 12.094 | 477 | 20_1 | *Anacardium occidentale* | Anacardiaceae | 41 | 326 | 98 |
| 20_1 | *Bombax costatum* | Malvaceae | 1 | 8 | 2 |
| 20_2 | *Anacardium occidentale* | Anacardiaceae | 65 | 518 | 100 |
| 20_3 | *Anacardium occidentale* | Anacardiaceae | 42 | 334 | 98 |
| 20_3 | *Prosopis africana* | Leguminosae | 1 | 8 | 2 |
| Afia/3 | -14.723 | 11.936 | 105 | 3_1 | *Anacardium occidentale* | Anacardiaceae | 40 | 318 | 100 |
| 3_2 | *Anacardium occidentale* | Anacardiaceae | 56 | 446 | 100 |
| 3_3 | *Anacardium occidentale* | Anacardiaceae | 63 | 502 | 99 |
| 3_3 | *Cassia sieberiana* | Leguminosae | 1 | 8 | 2 |
| Brincasse/27 | -14.552 | 12.210 | 362 | 27_1 | *Anacardium occidentale* | Anacardiaceae | 41 | 326 | 100 |
| 27_2 | *Anacardium occidentale* | Anacardiaceae | 50 | 398 | 100 |
| 27_3 | *Anacardium occidentale* | Anacardiaceae | 52 | 414 | 100 |
| Catacunda/0 | -14.431 | 12.052 | 147 | 0_1 | *Anacardium occidentale* | Anacardiaceae | 38 | 303 | 100 |
| 0_2 | *Anacardium occidentale* | Anacardiaceae | 31 | 247 | 100 |
| 0_3 | *Anacardium occidentale* | Anacardiaceae | 22 | 175 | 100 |
| Bambadinca/11 | -14.473 | 12.161 | 236 | 11_1 | *Anacardium occidentale* | Anacardiaceae | 49 | 390 | 100 |
| 11_2 | *Anacardium occidentale* | Anacardiaceae | 50 | 398 | 100 |
| 11_3 | *Anacardium occidentale* | Anacardiaceae | 45 | 358 | 94 |
| 11_4 | *Cassia sieberiana* | Leguminosae | 1 | 8 | 2 |
| 11_5 | *Erythrina senegalensis* | Leguminosae | 1 | 8 | 2 |
| 11_6 | *Ficus sp.* | Moraceae | 1 | 8 | 2 |
| Campate/30 | -14.592 | 11.895 | 351 | 30_1 | *Anacardium occidentale* | Anacardiaceae | 31 | 247 | 82 |
| 30_1 | *Elaeis guineensis* | Arecaceae | 7 | 56 | 18 |
| 30_2 | *Anacardium occidentale* | Anacardiaceae | 50 | 398 | 100 |
| 30_3 | *Anacardium occidentale* | Anacardiaceae | 47 | 374 | 100 |
| Dulombi/32 | -14.503 | 11.861 | 426 | 32_1 | *Anacardium occidentale* | Anacardiaceae | 54 | 430 | 93 |
| 32_1 | *Elaeis guineensis* | Arecaceae | 4 | 32 | 7 |
| 32_2 | *Anacardium occidentale* | Anacardiaceae | 80 | 637 | 100 |
| 32_3 | *Anacardium occidentale* | Anacardiaceae | 65 | 518 | 99 |
| 32_3 | *Elaeis guineensis* | Arecaceae | 1 | 8 | 1 |
| Gã-Fati/14 | -14.678 | 12.082 | 351 | 14_1 | *Anacardium occidentale* | Anacardiaceae | 32 | 255 | 97 |
| 14_2 | *Elaeis guineensis* | Arecaceae | 1 | 8 | 3 |
| 14_2 | *Anacardium occidentale* | Anacardiaceae | 37 | 295 | 100 |
| 14_3 | *Anacardium occidentale* | Anacardiaceae | 23 | 183 | 96 |
| 14_4 | *Pterocarpus erinaceus* | Leguminosae | 1 | 8 | 4 |
| Bagadadje/15 | -14.727 | 12.006 | 185 | 15_1 | *Anacardium occidentale* | Anacardiaceae | 30 | 239 | 86 |
| 15_1 | *Pterocarpus erinaceus* | Leguminosae | 1 | 8 | 3 |
| 15_1 | *Terminalia macroptera* | Combretaceae | 4 | 32 | 11 |
| 15_2 | *Anacardium occidentale* | Anacardiaceae | 47 | 374 | 100 |
| 15_3 | *Anacardium occidentale* | Anacardiaceae | 39 | 311 | 98 |
| 15_3 | *Prosopis africana* | Leguminosae | 1 | 8 | 2 |
| Gabu | Sincha Manga/16 | -14.251 | 12.148 | 268 | 16_1 | *Anacardium occidentale* | Anacardiaceae | 32 | 255 | 100 |
| 16_2 | *Anacardium occidentale* | Anacardiaceae | 47 | 374 | 96 |
| 16_2 | *Parkia biglobosa* | Leguminosae | 1 | 8 | 2 |
| 16_2 | *Sclerocarya birrea* | Anacardiaceae | 1 | 8 | 2 |
| 16_3 | *Anacardium occidentale* | Anacardiaceae | 55 | 438 | 100 |
| Mamadu Molo/17 | -14.197 | 12.344 | 164 | 17_1 | *Anacardium occidentale* | Anacardiaceae | 64 | 510 | 100 |
| 17_2 | *Anacardium occidentale* | Anacardiaceae | 61 | 486 | 100 |
| 17_3 | *Anacardium occidentale* | Anacardiaceae | 46 | 366 | 100 |
| Biricunda/18 | -14.170 | 12.411 | 256 | 18_1 | *Anacardium occidentale* | Anacardiaceae | 22 | 175 | 100 |
| 18_2 | *Anacardium occidentale* | Anacardiaceae | 46 | 366 | 100 |
| 18_3 | *Anacardium occidentale* | Anacardiaceae | 38 | 303 | 90 |
| 18_3 | *Elaeis guineensis* | Arecaceae | 3 | 24 | 7 |
| 18_3 | *Neocarya macrophylla* | Chrysobalanaceae | 1 | 8 | 3 |
| Sintcha Debel/25 | -14.430 | 12.363 | 442 | 25_1 | *Anacardium occidentale* | Anacardiaceae | 25 | 199 | 100 |
| 25_2 | *Anacardium occidentale* | Anacardiaceae | 43 | 342 | 100 |
| 25_3 | *Anacardium occidentale* | Anacardiaceae | 65 | 518 | 99 |
| 25_3 | *Ficus sp.* | Moraceae | 1 | 8 | 1 |
| Nhatampa/29 | -14.468 | 12.283 | 376 | 29_1 | *Anacardium occidentale* | Anacardiaceae | 42 | 334 | 100 |
| 29_2 | *Anacardium occidentale* | Anacardiaceae | 33 | 263 | 100 |
| 29_3 | *Anacardium occidentale* | Anacardiaceae | 30 | 239 | 91 |
| 29_3 | *Detarium microcarpum* | Leguminosae | 1 | 8 | 3 |
| 29_3 | *Erythrophleum africanum* | Leguminosae | 1 | 8 | 3 |
| 29_3 | *Pericopsis laxiflora* | Leguminosae | 1 | 8 | 3 |
| Fassadji/36 | -14.434 | 12.238 | 239 | 36_1 | *Anacardium occidentale* | Anacardiaceae | 38 | 303 | 100 |
| 36_2 | *Anacardium occidentale* | Anacardiaceae | 38 | 303 | 100 |
| 36_3 | *Anacardium occidentale* | Anacardiaceae | 55 | 438 | 100 |
| Duma/40 | -14.294 | 12.385 | 102 | 40_1 | *Anacardium occidentale* | Anacardiaceae | 61 | 486 | 98 |
| 40_1 | *Cassia sieberiana* | Leguminosae | 1 | 8 | 2 |
| 40_2 | *Anacardium occidentale* | Anacardiaceae | 46 | 366 | 100 |
| 40_3 | *Anacardium occidentale* | Anacardiaceae | 70 | 557 | 100 |
| Sintcham Dembel/44 | -14.104 | 12.500 | 423 | 44_1 | *Anacardium occidentale* | Anacardiaceae | 43 | 342 | 100 |
| 44_2 | *Anacardium occidentale* | Anacardiaceae | 42 | 334 | 100 |
| 44_3 | *Anacardium occidentale* | Anacardiaceae | 37 | 295 | 100 |
| Cansamanje/4 | -14.303 | 12.255 | 241 | 4_1 | *Anacardium occidentale* | Anacardiaceae | 42 | 334 | 100 |
| 4_2 | *Anacardium occidentale* | Anacardiaceae | 38 | 303 | 100 |
| 4_3 | *Anacardium occidentale* | Anacardiaceae | 50 | 398 | 98 |
| 4_3 | *Ficus sp.* | Moraceae | 1 | 8 | 2 |
| Samba Candu/5 | -14.222 | 12.532 | 268 | 5_1 | *Anacardium occidentale* | Anacardiaceae | 56 | 446 | 96 |
| 5_1 | *Dichrostachys cinerea* | Leguminosae | 1 | 8 | 2 |
| 5_1 | *Hexalobus monopetalus* | Annonaceae | 1 | 8 | 2 |
| 5_2 | *Anacardium occidentale* | Anacardiaceae | 20 | 159 | 95 |
| 5_2 | *Cassia sieberiana* | Leguminosae | 1 | 8 | 5 |
| 5_3 | *Anacardium occidentale* | Anacardiaceae | 21 | 167 | 100 |
| Taibata/7 | -14.286 | 12.471 | 252 | 7_1 | *Anacardium occidentale* | Anacardiaceae | 46 | 366 | 100 |
| 7_2 | *Anacardium occidentale* | Anacardiaceae | 37 | 295 | 94 |
| 7_2 | *Bombax costatum* | Malvaceae | 1 | 8 | 3 |
| 7_2 | *Terminalia macroptera* |  | 1 | 8 | 3 |
| 7_3 | *Anacardium occidentale* | Anacardiaceae | 23 | 183 | 100 |
| Dembael Uri/9 | -14.418 | 12.292 | 174 | 9_1 | *Anacardium occidentale* | Anacardiaceae | 51 | 406 | 96 |
| 9_1 | *Bombax costatum* | Malvaceae | 1 | 8 | 2 |
| 9_1 | *Caesalpinia benthamiana* | Leguminosae | 1 | 8 | 2 |
| 9_2 | *Anacardium occidentale* | Anacardiaceae | 40 | 318 | 100 |
| 9_3 | *Anacardium occidentale* | Anacardiaceae | 29 | 231 | 100 |
